# Supplementary material
Source: PubMed Central journal article supplement (PMC4149918)
Supplement: NIHMS594224-supplement-04.pdf [file NIHMS594224-supplement-04.pdf]

# Supplementary figure 3

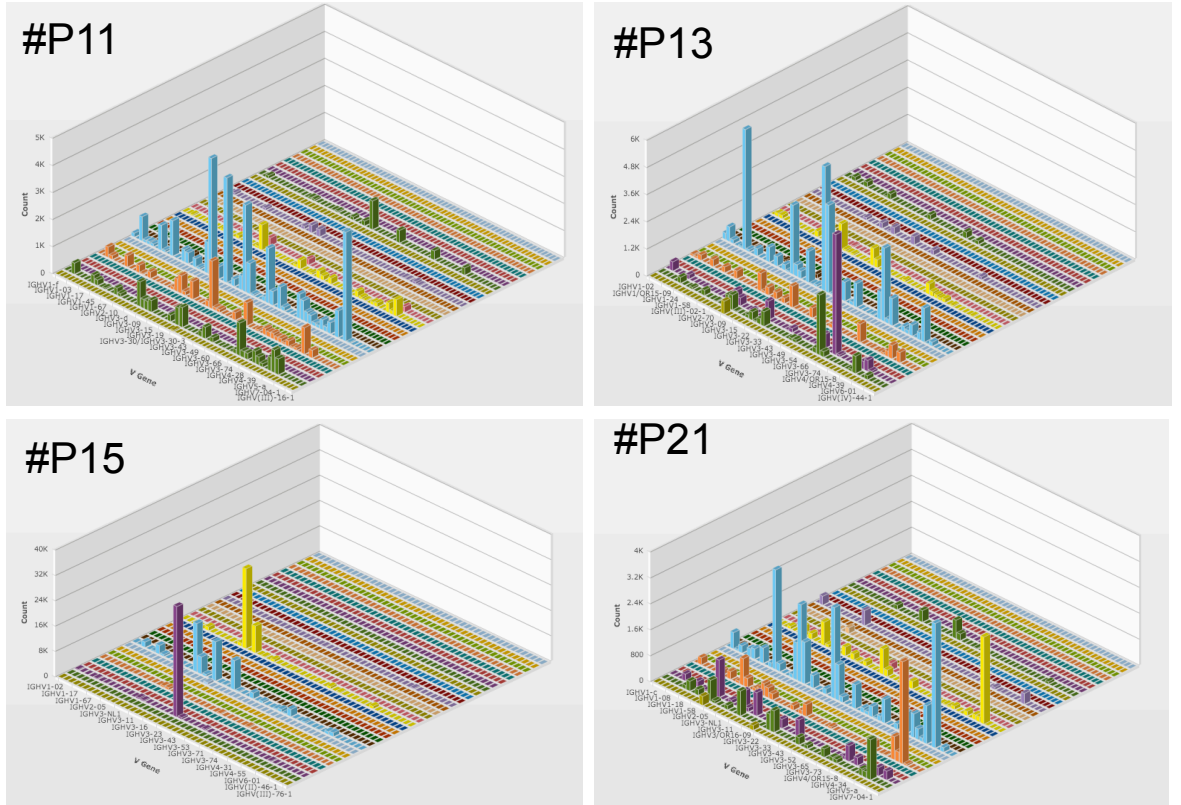

| J Gene     |             |            |            |             |             |             |  |  |  |  |  |
|------------|-------------|------------|------------|-------------|-------------|-------------|--|--|--|--|--|
| IGHJ6*04_F | IGHJ6*03_F  | IGHJ6*02_F | IGHJ6*01_F | IGHJ6       | IGHJ5*02_F  | IGHJ5*01_F  |  |  |  |  |  |
| IGHJ5      | IGHJ4*03_F  | IGHJ4*02_F | IGHJ4*01_F | IGHJ4       | IGHJ3P*02_P | IGHJ3P*01_P |  |  |  |  |  |
| IGHJ3P     | IGHJ3*02_F  | IGHJ3*01_F | IGHJ3      | IGHJ2P*01_P | IGHJ2P      | IGHJ2*01_F  |  |  |  |  |  |
| IGHJ2      | IGHJ1P*01_P | IGHJ1P     | IGHJ1*01_F | IGHJ1       | IGHJ6       | IGHJ5       |  |  |  |  |  |
| IGHJ4      | IGHJ3       | IGHJ2      | IGHJ1      |             |             |             |  |  |  |  |  |
