# Supplementary material
Source: PubMed Central journal article supplement (PMC4149918)

# Supplementary figure 1

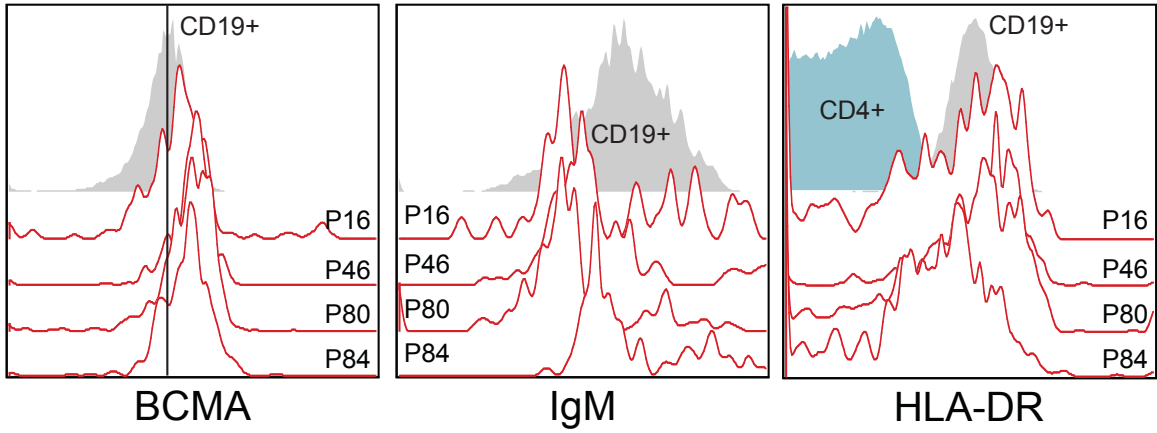

Supplement: NIHMS594224-supplement-02.pdf [file NIHMS594224-supplement-02.pdf]

# Supplementary figure 2

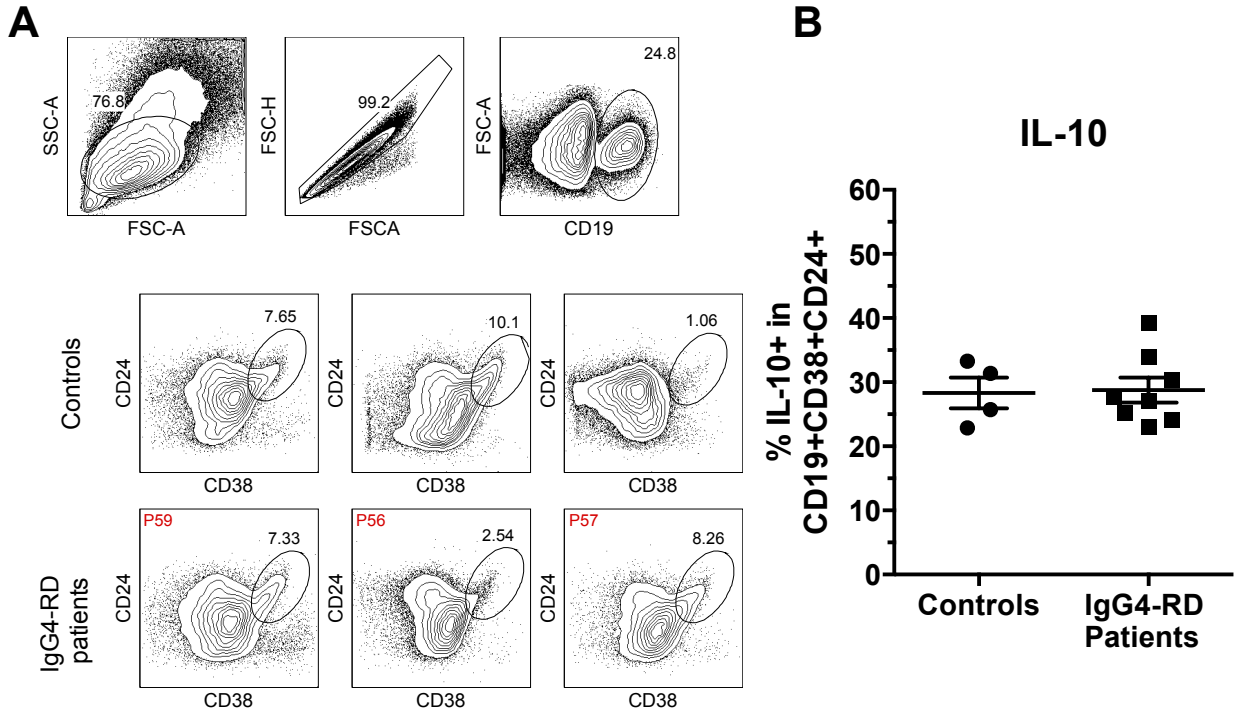

Supplement: NIHMS594224-supplement-03.pdf [file NIHMS594224-supplement-03.pdf]

# Supplementary Figure 4

## IgG4-RD\_P8

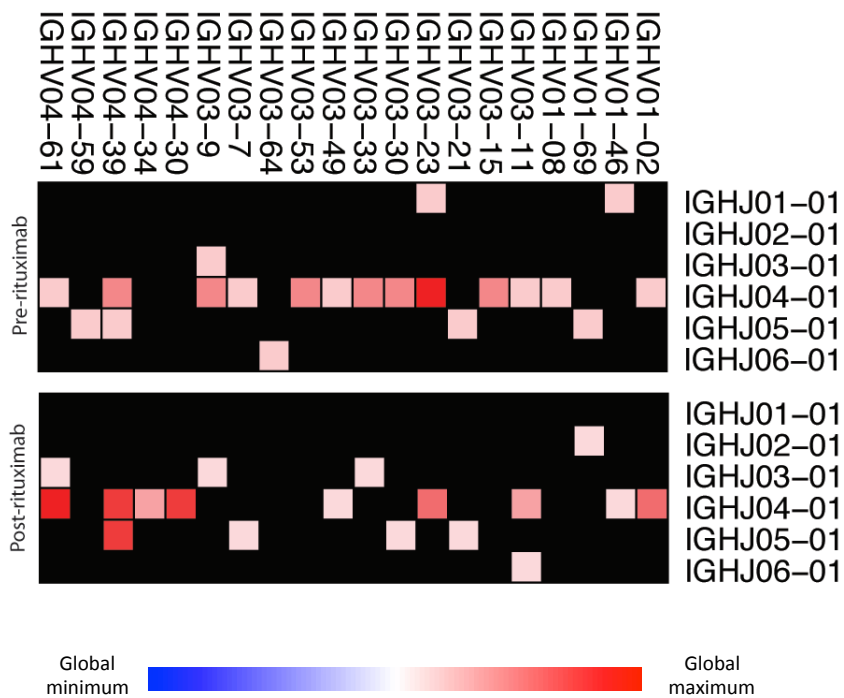

Supplement: NIHMS594224-supplement-05.pdf [file NIHMS594224-supplement-05.pdf]

**A**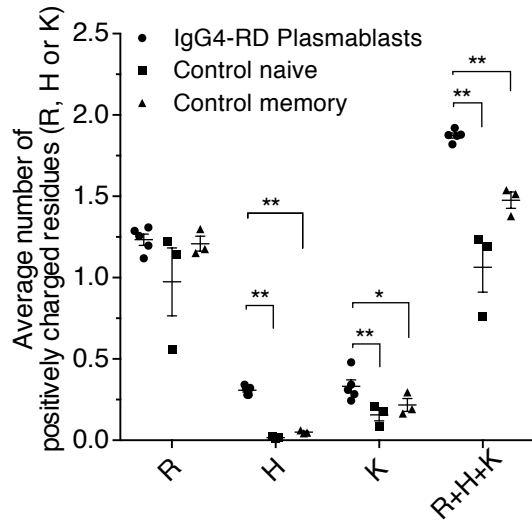**B**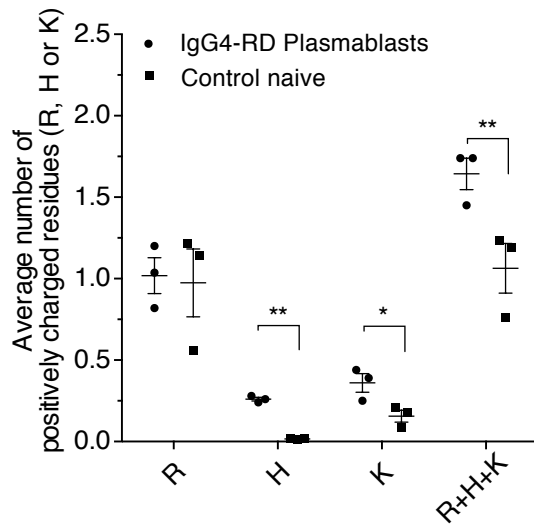

Supplement: NIHMS594224-supplement-06.pdf [file NIHMS594224-supplement-06.pdf]

# Hep-2 lysate ELISA

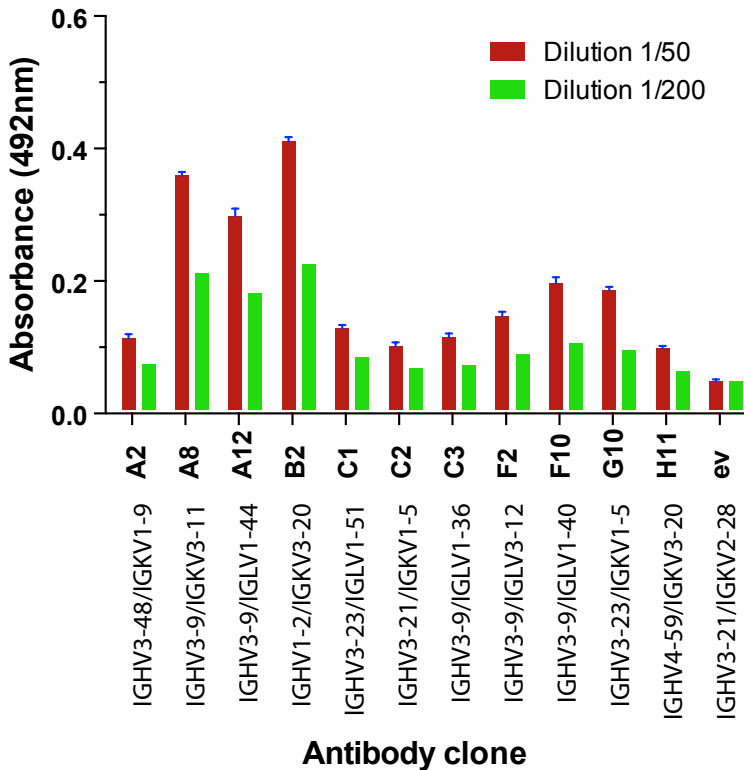

Supplement: NIHMS594224-supplement-07.pdf [file NIHMS594224-supplement-07.pdf]
